# Supplementary material for: A mechanically robust and high-wettability multifunctional network binder for high-loading Li–S batteries with an enhanced rate property
Source: Royal Society of Chemistry journal article supplement (doi:10.1039/d1ta04491e), 2021-01-01
Supplement: d1ta04491e1.pdf [file d1ta04491e1.pdf]

## Supporting Information

A mechanically robust and high-wettability multifunctional  
network binder for high-loading Li-S battery with enhanced rate  
property

Di Yu,<sup>ab</sup> Qian Zhang,<sup>ac\*</sup> Jie Liu,<sup>ab\*</sup> Ziyang Guo,<sup>ac</sup> Lei Wang<sup>ad</sup>

*<sup>a</sup>State Key Laboratory base of Eco-chemical Engineering, Taishan Scholar Advantage and Characteristic Discipline Team of Eco-chemical Process and Technology, Qingdao University of Science and Technology, Qingdao 266042, China*

*<sup>b</sup>College of Chemical Engineering, Qingdao University of Science and Technology, Qingdao 266042, China*

*<sup>c</sup>School of Chemistry and Molecular Engineering, Qingdao University of Science and Technology, Qingdao 266042, China*

*<sup>d</sup>College of Environment and Safety Engineering, Qingdao University of Science and Technology, Qingdao 266042, China*

*E-mail: q\_Zhang2020@126.com (Q. Zhang), jie.liu@qust.edu.cn (J. Liu)*

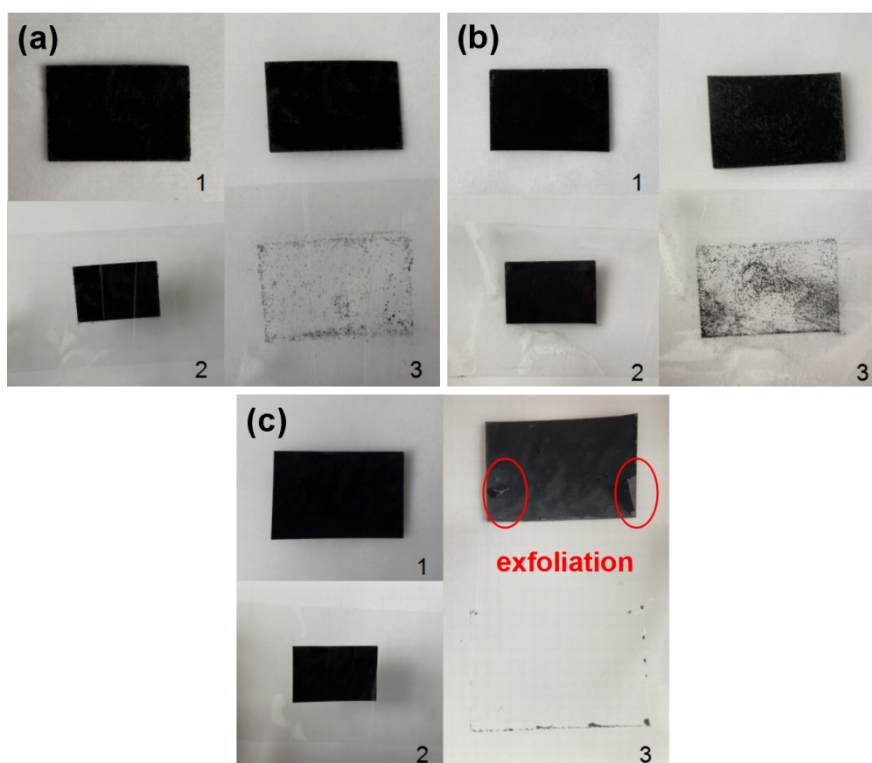

**Fig. S1** The peeling tests of the sulfur cathodes with (a) c-Alg-IS binder, (b) Alg binder, and (c) PVDF binder, showing the superior binding capability of c-Alg-IS binder. 1 sulfur cathode after drying; 2 sulfur cathode with adhesive tape; 3 sulfur cathode after peeling off the tape.

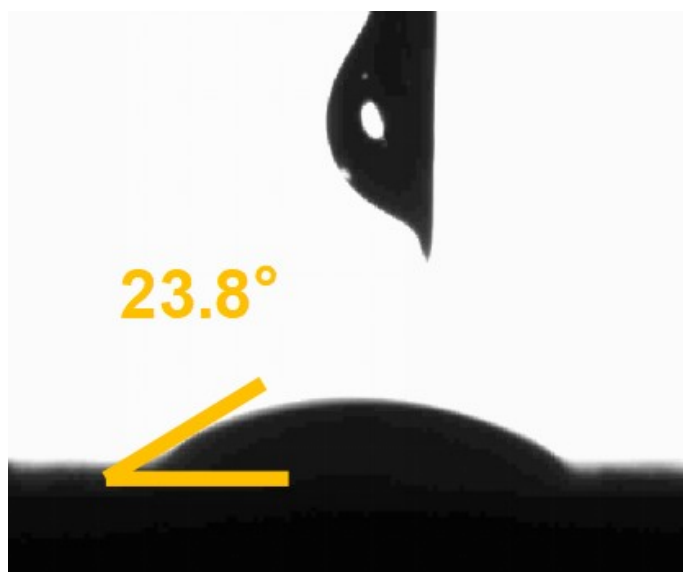

**Fig. S2** The electrolyte contact angles of PVDF binder.

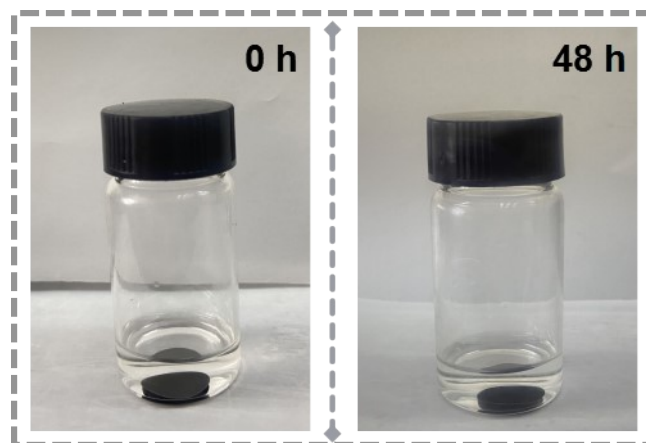

**Fig. S3** The digital images of the sulfur cathode using c-Alg-IS binder immersed in the electrolyte of Li-S battery after 0 and 48 h, respectively. The electrode is made of 70 wt% S/super P composite, 10 wt% KB, and 20 wt% c-Alg-IS binder. After soaking for 48 h, the materials are not peeled off from the current collector, which indicates the excellent chemical stability of c-Alg-IS binder in the electrolyte.

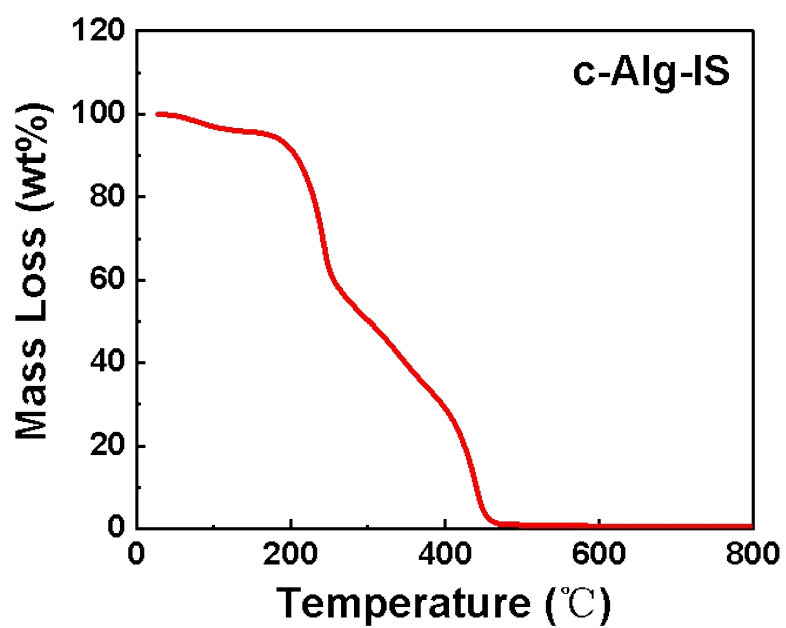

**Fig. S4** TGA curve of c-Alg-IS under air flow with a heating rate of 10 °C min<sup>-1</sup>, showing the high thermal stability (up to 200 °C) of c-Alg-IS under air condition.

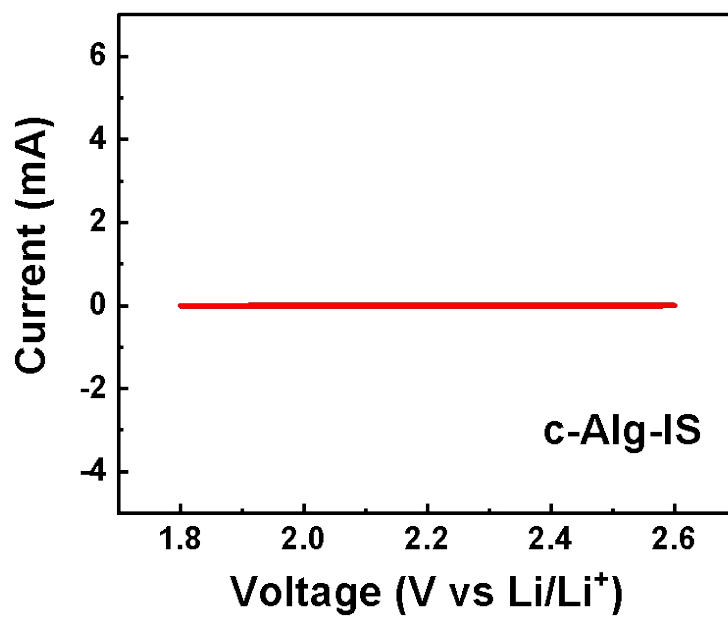

**Fig. S5** CV curves of c-Alg-IS binder at  $0.1 \text{ mV s}^{-1}$ , showing the high electrochemical stability of c-Alg-IS binder.

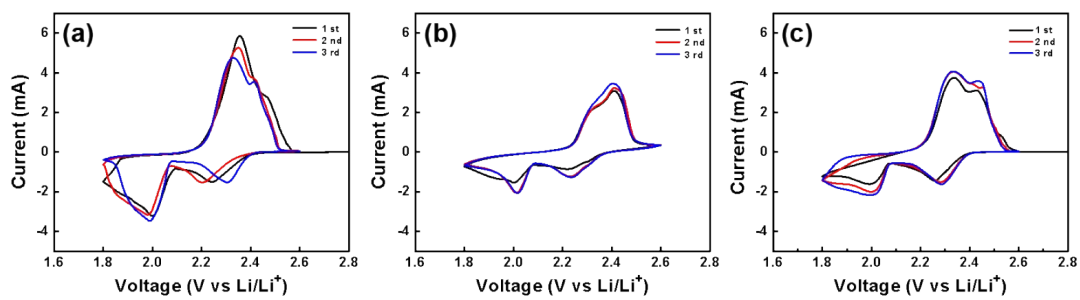

**Fig. S6** The CV curves of Li-S cells with (a) Alg, (b) IS, and (c) PVDF binders using a CHI660E electrochemical workstation at a scanning rate of  $0.1 \text{ mV s}^{-1}$  between 1.8 and 2.6 V.

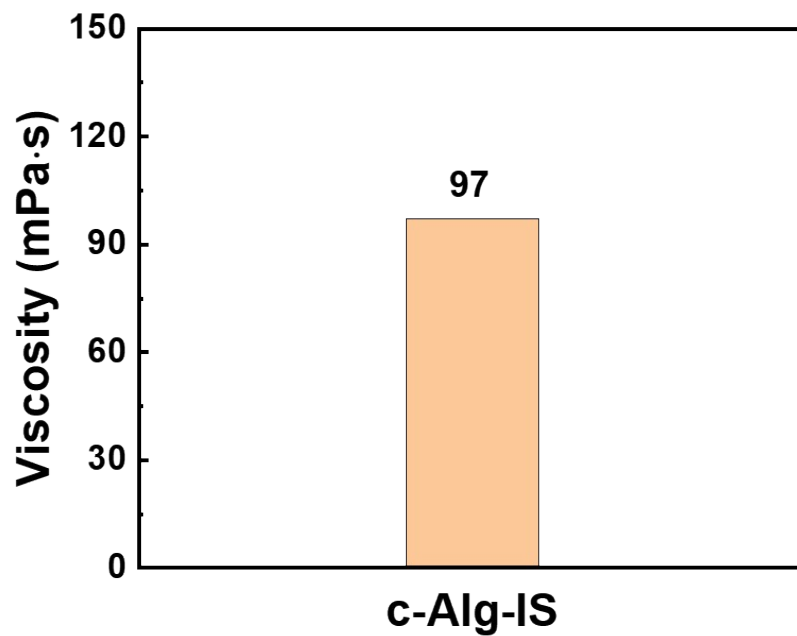

**Fig. S7** The viscosity test of IS aqueous solution by rotor 1 on a viscosity analyzer (Techcomp SNP-1).



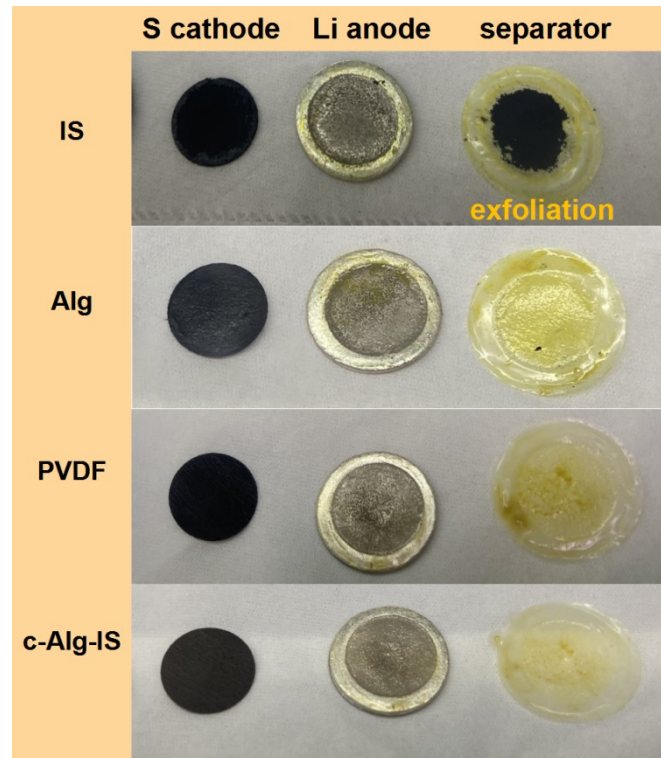

**Fig. S8** The digital images of the sulfur cathodes with different binders, Li anodes, and the separators after 20 cycles at 0.2 C.

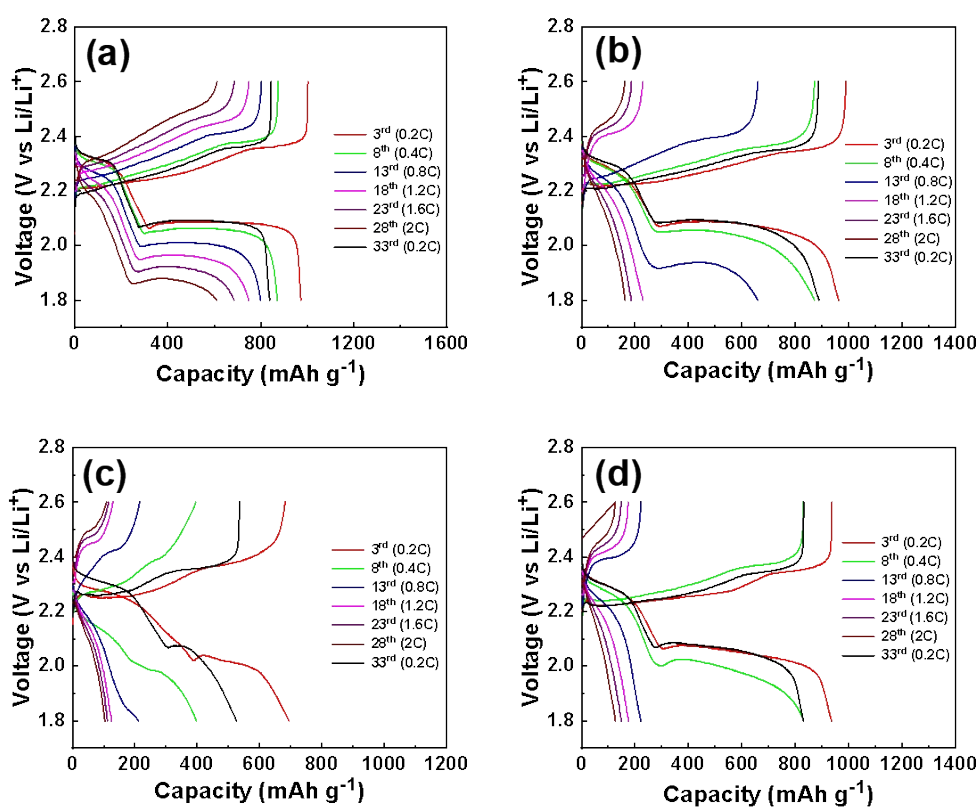

**Fig. S9** The charge-discharge curves of Li-S cell with (a) c-Alg-IS, (b) Alg, (c) IS, and (d) PVDF binder at different current rates.

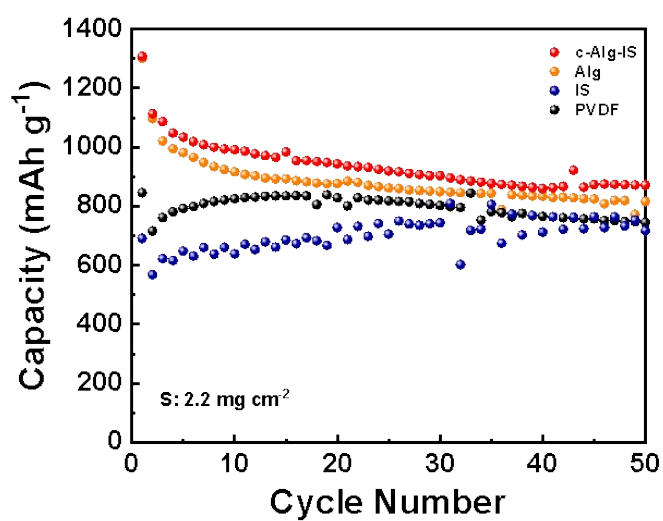

**Fig. S10** Comparison of cycling performance of Li-S batteries with different binders at 0.2 C (the first cycle is at 0.1 C). The sulfur cathodes consist of 80 wt% S/super P composite, 10 wt% KB, and 10 wt% binder.

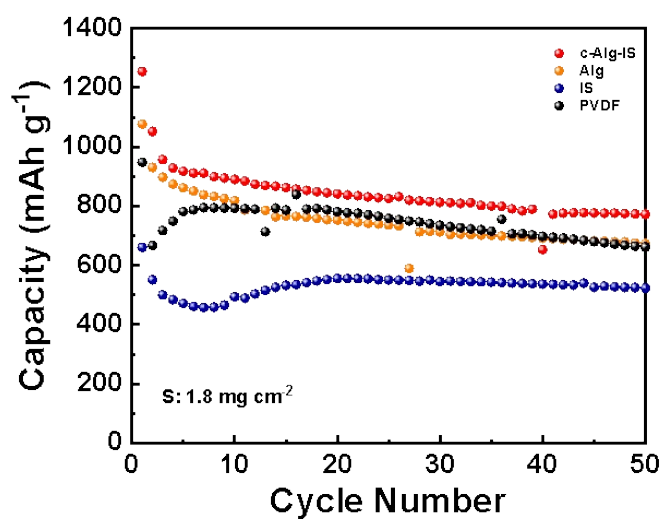

**Fig. S11** Comparison of cycling performance of Li-S batteries with different binders at 0.2 C (the first cycle is at 0.1 C). The sulfur cathodes consist of 70 wt% S/super P composite, 10 wt% KB, and 20 wt% binder. The electrolyte is 1M LiTFSI in DOL : DME (1:1 Vol%).

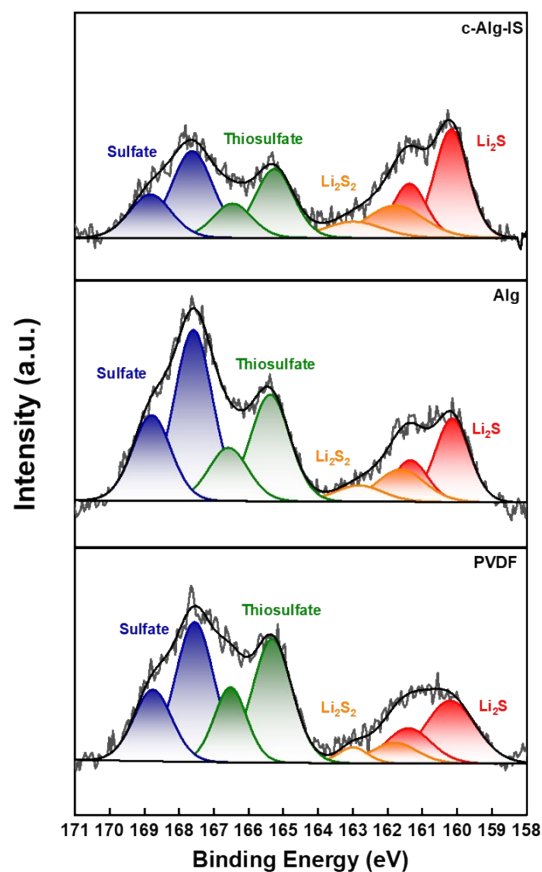

**Fig. S12** High-resolution S2p XPS spectra of Li anodes from the Li-S cells using different binders after 20 cycles, showing the sulfide species on the Li anode surfaces are similar.<sup>1,2</sup> The Li anode was cleaned with DME solution before XPS test.

Reference:

1. G. Ye, M. Zhao, L. P. Hou, W. J. Chen, X. Q. Zhang, B. Q. Li, J. Q. Huang, *J. Energy Chem.*, 2022, **66**, 24-29.
2. W. X. Hua, H. Li, C. Pei, J. Y. Xia, Y. F. Sun, C. Zhang, W. Lv, Y. Tao, Y. Jiao, B. S. Zhang, S. Z. Qiao, Y. Wan, Q. H. Yang, *Adv. Mater.*, 2021, <https://doi.org/10.1002/adma.202101006>.

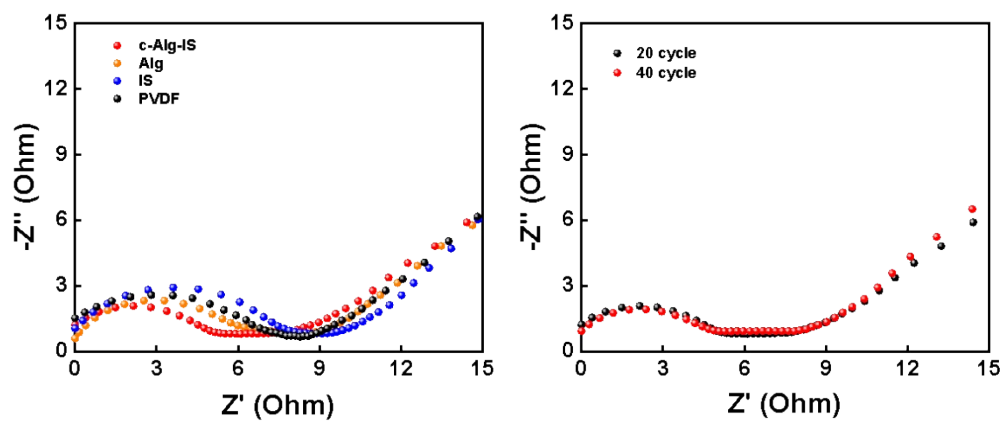

**Fig. S13** (a) The Nyquist plots of Li-S batteries with different binders after 20 cycles at 0.2 C; (b) the Nyquist plots of Li-S battery with c-Alg-IS binder after 20 and 40 cycles at 0.2 C.

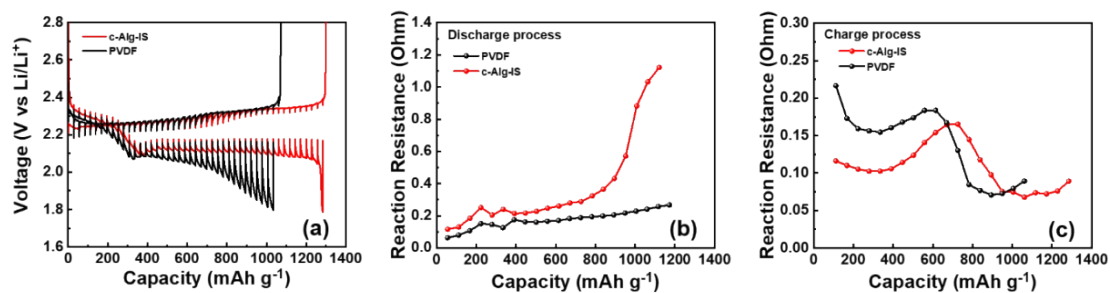

**Fig. S14** (a) GITT voltage profiles of Li-S batteries with different binders during the first cycle; reaction resistance comparison of Li-S batteries with different binders (b) during discharge process and (c) during charge process. The galvanostatic intermittent titration technique (GITT) measurements were carried out by applying a pulse constant current of 0.1 C with duration of 10 min, followed by 1 h relaxation to reach an equilibrium voltage. The reaction resistances at different lithiation/delithiation stages were obtained by dividing the overpotential by the pulse current.<sup>1,2</sup>

Reference:

1. K. Xu, X. Liu, J. Liang, J. Cai, K. Zhang, Y. Lu, X. Wu, M. Zhu, Y. Liu, Y. Zhu, G. Wang, Y. Qian, *ACS Energy Letters*, 2018, **3**, 420-427.
2. J. Zhou, X. Liu, L. Zhu, J. Zhou, Y. Guan, L. Chen, S. Niu, J. Cai, D. Sun, Y. Zhu, J. Du, G. Wang, Y. Qian, *Joule*, 2018, **2**, 2681-2693.

**Table S1** Comparison of the battery parameters with the recently reported binder-related high-loading Li-S batteries, showing the forefront of our work on areal loading and areal capacity.

| Ref. <sup>a</sup> | Polymer binder               | Sulfur loading (mg cm <sup>-2</sup> ) | Current density                                   | Sulfur content | Initial discharge capacity (mAh g <sup>-1</sup> ) / (mAh cm <sup>-2</sup> ) | Reversible discharge capacity (mAh g <sup>-1</sup> ) / Cycle number | Degradation rate per cycle |
|-------------------|------------------------------|---------------------------------------|---------------------------------------------------|----------------|-----------------------------------------------------------------------------|---------------------------------------------------------------------|----------------------------|
| <b>This work</b>  | <b>c-Alg-IS binder</b>       | <b>9.1</b>                            | <b>2.4 mA cm<sup>-2</sup></b><br><b>(~0.16 C)</b> | <b>56%</b>     | <b>1260.2/11.5</b>                                                          | <b>788.4/60</b>                                                     | <b>0.62%</b>               |
|                   |                              | <b>14.8</b>                           | <b>0.4 mA cm<sup>-2</sup></b><br><b>(~0.02C)</b>  | <b>56%</b>     | <b>1198.1/17.8</b>                                                          | <b>756.3/9</b>                                                      | <b>NA</b>                  |
| 31                | SPP binder                   | 8.9                                   | 0.1 C                                             | 60.61%         | 932.8/8.3                                                                   | 792.9/50                                                            | 0.30%                      |
| 32                | S9P1 binder                  | 6.1                                   | 0.1 C                                             | 60%            | 999.1/6.1                                                                   | 800.3/50                                                            | 0.40%                      |
| 33                | SA-Cu binder                 | 8.05                                  | 1.0 mA cm <sup>-2</sup><br>(~0.07 C)              | 54%            | 1180.1/9.5                                                                  | 892.0/29                                                            | 0.84%                      |
| 48                | PVP/XNBR30 binder            | 7.0                                   | 0.1 C                                             | 56%            | 769.0/5.4                                                                   | NA                                                                  | NA                         |
| 57                | G4CMP binder                 | 4.38                                  | 0.05C/0.2 C                                       | 68%            | 1045.0/4.32                                                                 | 640.0/100                                                           | 0.39%                      |
| 58                | PPG binder                   | 4.9                                   | 0.1 C                                             | 60%            | 933.6/4.6                                                                   | 761.0/50                                                            | 0.37%                      |
| 59                | DICP binder                  | 5.5                                   | 0.1 C                                             | 56%            | 1448.0/6.39                                                                 | 841.7/100                                                           | 0.42%                      |
| 60                | PAA-HPRN <sup>+</sup> binder | 6.78                                  | 0.1 C                                             | 52.16%         | 1112.1/7.54                                                                 | 1028.0/21                                                           | 0.36%                      |

<sup>a</sup> The references are listed in the main text.
